# Supplementary material
Source: publisher site journal article supplement (https://static.cambridge.org/content/id/urn:cambridge.org:id:article:S0008347X19000221/resource/name/S0008347X19000221supp001.xlsx)
Supplement: Supplementary file 1 [file S0008347X19000221supp001.xlsx]

## Sheet: SpeciesList
Supplemental Table 1. Full list of arthropod species recommended for listing by COSEWIC and listed as at risk federally under SARA, as well as arthropod species listed as at risk under the provincial acts of Manitoba, Ontario, Quebec, New Brunswick and Nova Scotia, as of January 2019. Refer to the main text for definitions of the COSEWIC status, SARA schedule, and SARA status. Range indicates whe…
				FEDERAL																	PROVINCIAL
				COSEWIC	SARA	SARA	Range														MB	ON	QC	NB	NS
Order	Common name	Scientific name	Population	status	schedule	status	YK	NT	NU	BC	AB	SK	MB	ON	QC	NB	PE	NS	NL		ESEA status	ESA status	TVSA status	SARA status	ESA status
Araneae	Georgia Basin Bog Spider	Gnaphosa snohomish		SC	S1	SC	.	.	.	X	.	.	.	.	.	.	.	.	.		.	.	.	.	.
Coleoptera	American Burying Beetle	Nicrophorus americanus		XT	S1	XT	.	.	.	.	.	.	.	X	X	.	.	.	.		.	XT	not assessed	.	.
	Audouin’s Night-stalking Tiger Beetle	Omus audouini		THR	S1	THR	.	.	.	X	.	.	.	.	.	.	.	.	.		.	.	.	.	.
	Bert's Predaceous Diving Beetle	Sanfilippodytes bertae		END	S1	END	.	.	.	.	X	.	.	.	.	.	.	.	.		.	.	.	.	.
	Cobblestone Tiger Beetle	Cicindela marginipennis		END	S1	END	.	.	.	.	.	.	.	.	.	X	.	.	.		.	.	.	END	.
	Gibson's Big Sand Tiger Beetle	Cicindela formosa gibsoni		THR	S1	THR	.	.	.	.	X	X	.	.	.	.	.	.	.		.	.	.	.	.
	Hungerford's Crawling Water Beetle	Brychius hungerfordi		END	S1	END	.	.	.	.	.	.	.	X	.	.	.	.	.		.	END	.	.	.
	Nine-spotted Lady Beetle	Coccinella novemnotata		END	none	none	.	.	.	X	X	X	X	X	X	.	.	.	.		not assessed	END	not assessed	.	.
	Northern Barrens Tiger Beetle	Cicindela patruela		END	S1	END	.	.	.	.	.	.	.	X	X	.	.	.	.		.	END	not assessed	.	.
	Transverse Lady Beetle	Coccinella transversoguttata		SC	none	none	X	X	X	X	X	X	X	X	X	X	X	X	X		not assessed	END	not assessed	not assessed	END
	Wallis' Dark Saltflat Tiger Beetle	Cicindela parowana wallisi		END	S1	END	.	.	.	X	.	.	.	.	.	.	.	.	.		.	.	.	.	.
Diptera	Dune Tachinid Fly	Germaria angustata		SC	S1	SC	X	.	.	.	.	.	.	.	.	.	.	.	.		.	.	.	.	.
	Okanagan Efferia	Efferia okanagana		END	S1	END	.	.	.	X	.	.	.	.	.	.	.	.	.		.	.	.	.	.
Hemiptera	Red-tailed Leafhopper	Aflexia rubranura	Great Lakes Plains	SC	none	none	.	.	.	.	.	.	.	X	.	.	.	.	.		.	not assessed	.	.	.
Hymenoptera	Gypsy Cuckoo Bumble Bee	Bombus bohemicus		END	S1	END	X	X	.	X	X	X	X	X	X	X	X	X	X		not assessed	END	not assessed	not assessed	END
	Macropis Cuckoo Bee	Epeoloides pilosulus		END	S1	END	.	.	.	.	.	.	.	.	.	.	.	X	.		.	.	.	.	END
	Rusty-patched Bumble Bee	Bombus affinis		END	S1	END	.	.	.	.	.	.	.	X	X	.	.	.	.		.	END	not assessed	.	.
	Sable Island Sweat Bee	Lasioglossum sablense		THR	S1	THR	.	.	.	.	.	.	.	.	.	.	.	X	.		.	.	.	.	THR
	Western Bumble Bee mckayi subspecies	Bombus occidentalis mckayi		SC	none	none	X	X	.	X	.	.	.	.	.	.	.	.	.		.	.	.	.	.
	Western Bumble Bee occidentalis subspecies	Bombus occidentalis occidentalis		THR	none	none	.	.	.	X	X	X	.	.	.	.	.	.	.		.	.	.	.	.
	Yellow-banded Bumble Bee	Bombus terricola		SC	S1	SC	X	X	.	X	X	X	X	X	X	X	X	X	X		not assessed	SC	not assessed	not assessed	SC
Lepidoptera	Aweme Borer	Papaipema aweme		END	S1	END	.	.	.	.	.	.	.	X	.	.	.	.	.		.	END	.	.	.
	Behr's Hairstreak	Satyrium behrii		END	S1	END	.	.	.	X	.	.	.	.	.	.	.	.	.		.	.	.	.	.
	Bogbean Buckmoth	Hemileuca sp.		END	S1	END	.	.	.	.	.	.	.	X	.	.	.	.	.		.	END	.	.	.
	Dakota Skipper	Hesperia dacotae		END	S1	THR	.	.	.	.	.	X	X	.	.	.	.	.	.		THR	.	.	.	.
	Dun Skipper vestris subspecies	Euphyes vestris vestris		THR	S1	THR	.	.	.	X	.	.	.	.	.	.	.	.	.		.	.	.	.	.
	Dusky Dune Moth	Copablepharon longipenne		END	S1	END	.	.	.	.	X	X	X	.	.	.	.	.	.		END	.	.	.	.
	Eastern persius Duskywing	Erynnis persius persius		END	S1	END	.	.	.	.	.	.	.	X	.	.	.	.	.		.	XT	.	.	.
	Edwards' Beach Moth	Anarta edwardsii		END	S1	END	.	.	.	X	.	.	.	.	.	.	.	.	.		.	.	.	.	.
	Five-spotted Bogus Yucca Moth	Prodoxus quinquepunctellus		END	S1	END	.	.	.	.	X	.	.	.	.	.	.	.	.		.	.	.	.	.
	Frosted Elfin	Callophrys irus		XT	S1	XT	.	.	.	.	.	.	.	X	.	.	.	.	.		.	XT	.	.	.
	Gold-edged Gem	Schinia avemensis		END	S1	END	.	.	.	.	X	X	X	.	.	.	.	.	.		not assessed	.	.	.	.
	Half-moon Hairstreak	Satyrium semiluna		END	S1	END	.	.	.	X	X	.	.	.	.	.	.	.	.		.	.	.	.	.
	Hoptree Borer	Prays atomocella		END	none	none	.	.	.	.	.	.	.	X	.	.	.	.	.		.	END	.	.	.
	Island Blue	Plebejus saepiolus insulanus		END	S1	END	.	.	.	X	.	.	.	.	.	.	.	.	.		.	.	.	.	.
	Island Marble	Euchloe ausonides insulanus		XT	S1	XT	.	.	.	X	.	.	.	.	.	.	.	.	.		.	.	.	.	.
	Island Tiger Moth	Grammia complicata		THR	none	none	.	.	.	X	.	.	.	.	.	.	.	.	.		.	.	.	.	.
	Karner Blue	Lycaeides melissa samuelis		XT	S1	XT	.	.	.	.	.	.	.	X	.	.	.	.	.		.	XT	.	.	.
	Maritime Ringlet	Coenonympha nipisiquit		END	S1	END	.	.	.	.	.	.	.	.	X	X	.	.	.		.	.	THR	END	.
	Monarch	Danaus plexippus		END	S1	SC	.	X	.	X	X	X	X	X	X	X	X	X	X		not assessed	SC	not assessed	SC	END
	Mormon Metalmark	Apodemia mormo	Southern Mountain	END	S1	END	.	.	.	X	.	.	.	.	.	.	.	.	.		.	.	.	.	.
	Mormon Metalmark	Apodemia mormo	Prairie	SC	S1	THR	.	.	.	.	.	X	.	.	.	.	.	.	.		.	.	.	.	.
	Mottled Duskywing	Erynnis martialis	Great Lakes Plains	END	none	none	.	.	.	.	.	.	.	X	X	.	.	.	.		.	END	not assessed	.	.
	Mottled Duskywing	Erynnis martialis	Boreal	END	none	none	.	.	.	.	.	.	X	.	.	.	.	.	.		not assessed	.	.	.	.
	Non-pollinating Yucca Moth	Tegeticula corruptrix		END	S1	END	.	.	.	.	X	.	.	.	.	.	.	.	.		.	.	.	.	.
	Nuttall's Sheep Moth	Hemileuca nuttalli		END	none	none	.	.	.	X	.	.	.	.	.	.	.	.	.		.	.	.	.	.
	Oregon Branded Skipper	Hesperia colorado oregonia		END	none	none	.	.	.	X	.	.	.	.	.	.	.	.	.		.	.	.	.	.
	Ottoe Skipper	Hesperia ottoe		END	S1	END	.	.	.	.	.	.	X	.	.	.	.	.	.		THR	.	.	.	.
	Pale Yellow Dune Moth	Copablepharon grandis		SC	S1	SC	.	.	.	.	X	X	X	.	.	.	.	.	.		END	.	.	.	.
	Poweshiek Skipperling	Oarisma poweshiek		END	S1	THR	.	.	.	.	.	.	X	.	.	.	.	.	.		END	.	.	.	.
	Riding's Satyr	Neominois ridingsii		(not assessed)	.	.					X	X	X								XT	.	.	.	.
	Sand-verbena Moth	Copablepharon fuscum		END	S1	END	.	.	.	X	.	.	.	.	.	.	.	.	.		.	.	.	.	.
	Sonora Skipper	Polites sonora		NAR	S1	SC	.	.	.	X	.	.	.	.	.	.	.	.	.		.	.	.	.	.
	Taylor's Checkerspot	Euphydryas editha taylori		END	S1	END	.	.	.	X	.	.	.	.	.	.	.	.	.		.	.	.	.	.
	Uncas Skipper	Hesperia uncas		(not assessed)	.	.					X	X	X								END	.	.	.	.
	Verna's Flower Moth	Schinia verna		THR	S1	THR	.	.	.	.	X	X	X	.	.	.	.	.	.		END	.	.	.	.
	Weidemeyer's Admiral	Limenitis weidemeyerii		SC	S1	SC	.	.	.	.	X	.	.	.	.	.	.	.	.		.	.	.	.	.
	West Virginia White	Pieris virginiensis		(not assessed)	.	.								X	X						.	SC	not assessed	.	.
	White Flower Moth	Schinia bimatris		END	S1	END	.	.	.	.	.	.	X	.	.	.	.	.	.		END	.	.	.	.
	Yucca Moth	Tegeticula yuccasella		END	S1	END	.	.	.	.	X	.	.	.	.	.	.	.	.		.	.	.	.	.
Odonata	Hine's Emerald	Somatochlora hineana		END	S1	END	.	.	.	.	.	.	.	X	.	.	.	.	.		.	END	.	.	.
	Laura's Clubtail	Stylurus laurae		END	none	none	.	.	.	.	.	.	.	X	.	.	.	.	.		.	END	.	.	.
	Olive Clubtail	Stylurus olivaceus		END	S1	END	.	.	.	X	.	.	.	.	.	.	.	.	.		.	.	.	.	.
	Pygmy Snaketail	Ophiogomphus howei		SC	S1	SC	.	.	.	.	.	.	.	X	.	X	.	.	.		.	END	.	SC	.
	Rapids Clubtail	Gomphus quadricolor		END	S1	END	.	.	.	.	.	.	.	X	.	.	.	.	.		.	END	.	.	.
	Riverine Clubtail	Stylurus amnicola	Great Lakes Plains	END	S1	END	.	.	.	.	.	.	.	X	.	.	.	.	.		.	END	.	.	.
	Skillet Clubtail	Gomphus ventricosus		END	S1	END	.	.	.	.	.	.	.	.	.	X	.	.	.		.	.	.	END	.
	Vivid Dancer	Argia vivida		SC	none	none	.	.	.	X	X	.	.	.	.	.	.	.	.		.	.	.	.	.
Orthoptera	Greenish-white Grasshopper	Hypochlora alba		SC	S1	SC	.	.	.	.	X	X	X	.	.	.	.	.	.		not assessed	.	.	.	.
	Lake Huron Grasshopper	Trimerotropis huroniana		THR	none	none	.	.	.	.	.	.	.	X	.	.	.	.	.		.	THR	.	.	.
	Magdalen Islands Grasshopper	Melanoplus madeleineae		SC	none	none	.	.	.	.	.	.	.	.	X	.	.	.	.		.	.	not assessed	.	.
						Assessed spp	5	5	1	26	19	14	15	23	11	8	4	6	4
						Listed spp	3	3	0	18	15	11	12	16	7	7	3	5	3		9	23	1	5	6
						Protected spp	1	1	0	14	10	7	8	13	5	4	1	3	1		9	20	1	3	5
						END	1	1	0	11	8	3	5	10	4	4	1	2	1		6	15	0	3	4
						THR	0	0	0	2	2	4	3	0	0	0	0	1	0		2	1	1	0	1
						XT	0	0	0	1	0	0	0	3	1	0	0	0	0		1	4	0	0	0
						SC	2	2	0	4	5	4	4	3	2	3	2	2	2		0	3	0	2	1
						NS	2	2	1	8	4	3	3	7	4	1	1	1	1
						NAR	0	0	0	0	0	0	0	0	0	0	0	0	0
					XT	Extirpated
					END	Endangered
					THR	Threatened
					SC	Special Concern
					NS	No status
					NAR	Not At Risk
